# Supplementary material for: Flavonoid Nobiletin Attenuates Cyclophosphamide-Induced Cystitis in Mice through Mechanisms That Involve Inhibition of IL-1β Induced Connexin 43 Upregulation and Gap Junction Communication in Urothelial Cells
Source: MDPI journal article supplement (doi:10.3390/ijms23095037), 2022-05-01
Supplement: s1 [file s1]

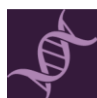

**Table S1.** Primers for real-time quantitative PCR.

| Species | Gene name                     |         | Primer sequences          | Amplicon size (b.p.) |
|---------|-------------------------------|---------|---------------------------|----------------------|
| Human   | <i>Cx43</i>                   | Forward | AGCAAAAGAGTGGTGCCCA       | 63                   |
|         |                               | Reverse | TTGTCAAGGAGTTTGCCTAAGG    |                      |
|         | <i>GAPDH</i>                  | Forward | GAAGGTGAAGGTCGGAGTC       | 226                  |
|         |                               | Reverse | GAAGATGGTGATGGGATTTC      |                      |
| Mouse   | <i>Nlrp3</i>                  | Forward | TGCTCTTCACTGCTATCAAGCCCT  | 85                   |
|         |                               | Reverse | ACAAGCCTTTGCTCCAGACCCTAT  |                      |
|         | <i>TNF-alpha</i>              | Forward | CATCTTCTCAAAATTCGAGTGACAA | 175                  |
|         |                               | Reverse | TGGGAGTAGACAAGGTACAACCC   |                      |
|         | <i>IL-1<math>\beta</math></i> | Forward | CAGGCAGGCAGTATCACTCA      | 90                   |
|         |                               | Reverse | TGTCCTCATCCTGGAAGGTC      |                      |
|         | <i>IL-6</i>                   | Forward | CCGGAGAGGAGACTTCACAG      | 102                  |
|         |                               | Reverse | TCCACGATTTCACAGAGAAC      |                      |
|         | <i>Rn18S</i>                  | Forward | ACTCAACACGGGAAACCTCA      | 123                  |
|         |                               | Reverse | AACCAGACAAATCGCTCCAC      |                      |
